# Supplementary material for: Enhancing perovskite solar cell performance through PbI2in situ passivation using a one-step process: experimental insights and simulations
Source: Royal Society of Chemistry journal article supplement (doi:10.1039/d4ra06193d), 2024-01-01
Supplement: d4ra06193d1.pdf [file d4ra06193d1.pdf]

## Supporting Information

# Enhancing Perovskite Solar Cells Performance through $\text{PbI}_2$ In-Situ Passivation by One-Step Process: Experimental Insights and Simulations.

Selma Rabhi<sup>a\*</sup>, Karthick Sekar<sup>b</sup>, Karol Kalna<sup>c</sup>, Tarak Hidouri<sup>d\*</sup>, Dip Prakash Samajdar<sup>e</sup>, Babban Kumar Ravidas<sup>f</sup>, Hichem Bencherif<sup>g</sup>, Roberto Fornari<sup>d,h</sup>, Kouloud Albaidani<sup>i</sup>, M. Khalid Hossain<sup>j</sup>

<sup>a</sup> *Laboratory of Innovative Environmental Preservation Techniques, Department of Chemistry, Constantine 1 University, 25000 Constantine, Algeria,*

<sup>b</sup> *IM2NP, CNRS UMR 7334, Aix-Marseille University, 13397 Marseille, France*

<sup>c</sup> *Nanoelectronics Devices Computational Group, Department of Electronic & Electrical Engineering, Faculty of Science & Engineering, Swansea University, Swansea, SA1 8EN, United Kingdom*

<sup>d</sup> *Department of Mathematical, Physical and Computer Sciences, University of Parma, 43124, Parma, Italy*

<sup>e</sup> *Department of ECE, Indian Institute of Information Technology, Design & Manufacturing, Jabalpur, Madhya Pradesh 482005, India*

<sup>f</sup> *Department of Natural Science, Indian Institute of Information Technology, Design & Manufacturing, Jabalpur, Madhya Pradesh 482005, India*

<sup>g</sup> *LEREESI, Higher National School of Renewable Energies, Environment and Sustainable Development, Batna 05078, Algeria*

<sup>h</sup> *MEM-CNR, Institute of Materials for Electronics and Magnetism, 43124, Parma, Italy*

<sup>i</sup> *Physics department, Faculty of science, King Khalid University, Abha 61411, Saudi Arabia*

<sup>j</sup> *Institute of Electronics, Atomic Energy Research Establishment, Bangladesh Atomic Energy Commission, Dhaka 1349, Bangladesh*

Email: [rabhi.selma@univ-medea.dz](mailto:rabhi.selma@univ-medea.dz) ; [tarek.hidouri@unipr.it](mailto:tarek.hidouri@unipr.it)

### 2.1 Materials.

Methylamine (40 wt% in methanol, Sigma Aldrich), hydroiodic acid (HI, 57 wt% water, Avantor VWR), lead iodide ( $\text{PbI}_2$ ) (99%, Sigma Aldrich), N-N dimethylformamide (DMF, anhydrous, 99.8%, Sigma Aldrich), diethyl ether (DEE,  $\geq 99.5\%$ , GC, Sigma Aldrich), isopropanol (IPA, anhydrous, 99.5%, Sigma Aldrich), acetone and ethanol (99%, Sigma Aldrich) were used as received without any further purification.

### 2.2 Fabrication and Characterization of $\text{MAPbI}_3$ film.

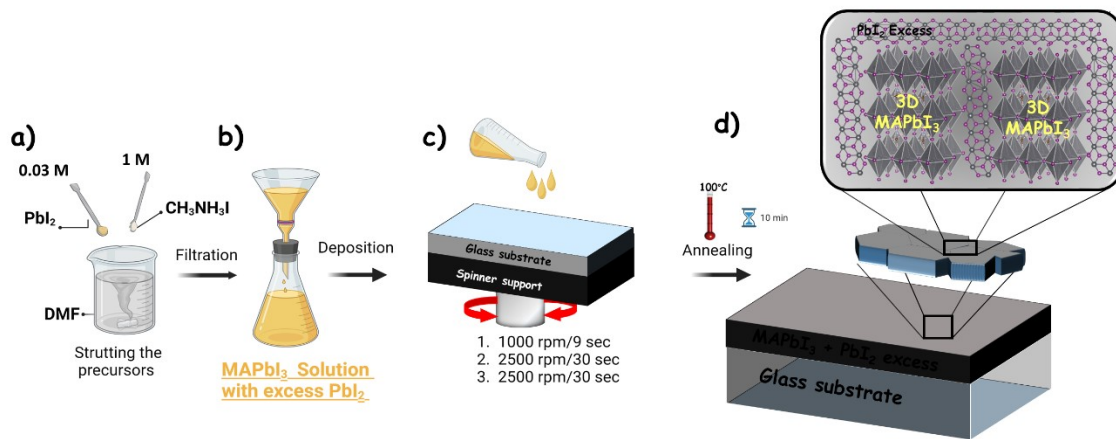

**Figure S1.** Overview schematics of MAPbI<sub>3</sub> film fabrication procedures. a) Strutting the perovskite precursors: 0.03M of PbI<sub>2</sub> quantity is three times higher than 1M of CH<sub>3</sub>NH<sub>3</sub>I. (b) Filtration of the MAPbI<sub>3</sub> solution to avoid grains that are not solubilized with DMF. (c) spin-coated the solution and annealing the sample at 100°C for 10 minutes. (d) Schematics of excess in PbI<sub>2</sub> and its distribution on GBs of the perovskite with an illustration structure of MAPbI<sub>3</sub> and PbI<sub>2</sub>.

Similar to the approach outlined by Tauc, we utilize a linear fit for the fundamental peak. Furthermore, a linear fit is employed as an abscissa for the slope below the fundamental absorption. The intersection of these two fitting lines provides an estimation of the band gap energy, as illustrated in **Figure S2**.

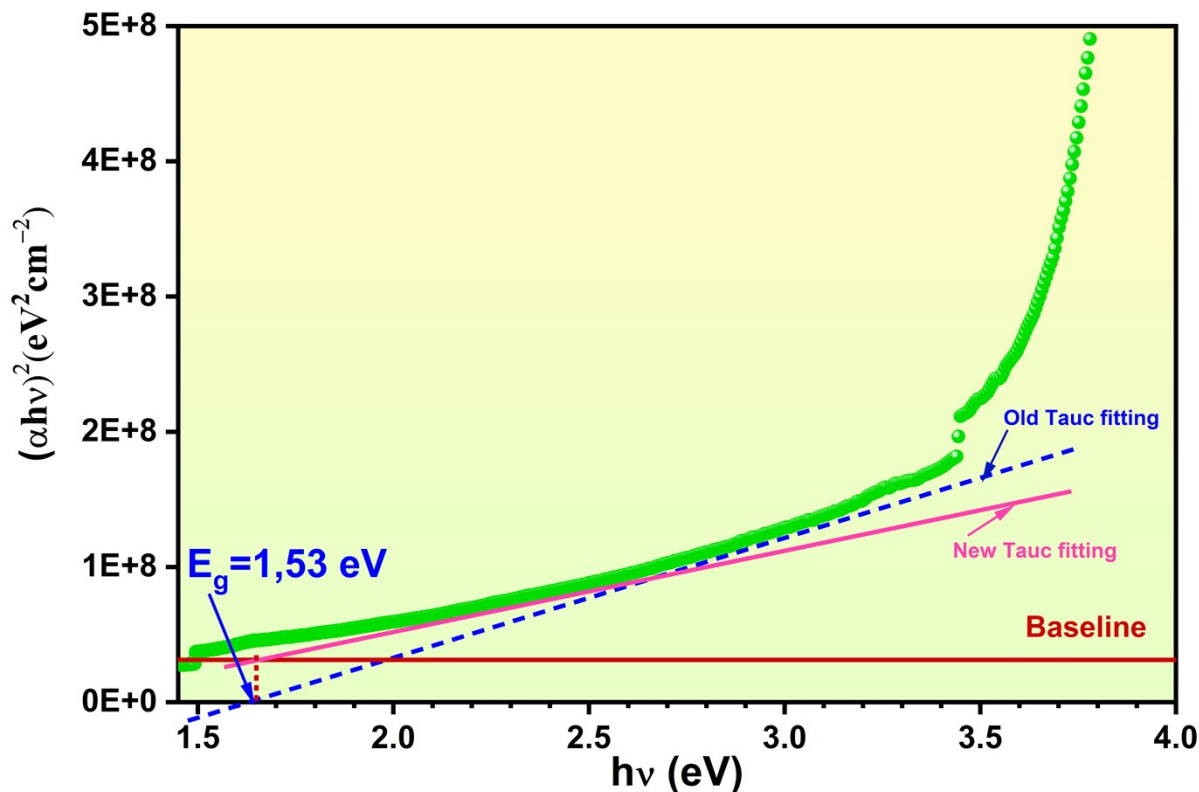

**Figure S2.** The determination of the  $E_g$  using a new approach.
